# Supplementary material for: Ratiometric electrochemical biosensor based on hybridization chain reaction signal amplification for sensitive microRNA-155 detection
Source: Royal Society of Chemistry journal article supplement (doi:10.1039/d4ay00868e), 2024-01-01
Supplement: d4ay00868e1.pdf [file d4ay00868e1.pdf]

## Supplementary Materials

### **Ratiometric electrochemical biosensor based on hybridization chain reaction signal amplification for sensitive microRNA-155 detection**

Yan Ma, Mengyao Li and Yuzhong Zhang\*

*College of Chemistry and Materials Science, Anhui Key Laboratory of Biomedical Materials and chemical Measurement,  
Anhui Normal University, Wuhu 241002, People's Republic of China*

---

\* Corresponding author. Tel: +86 553 3869303; Fax: +86 553 3869303  
E-mail address: zhyz65@mail.ahnu.edu.cn (Y. Zhang)

## Optimization of experimental conditions

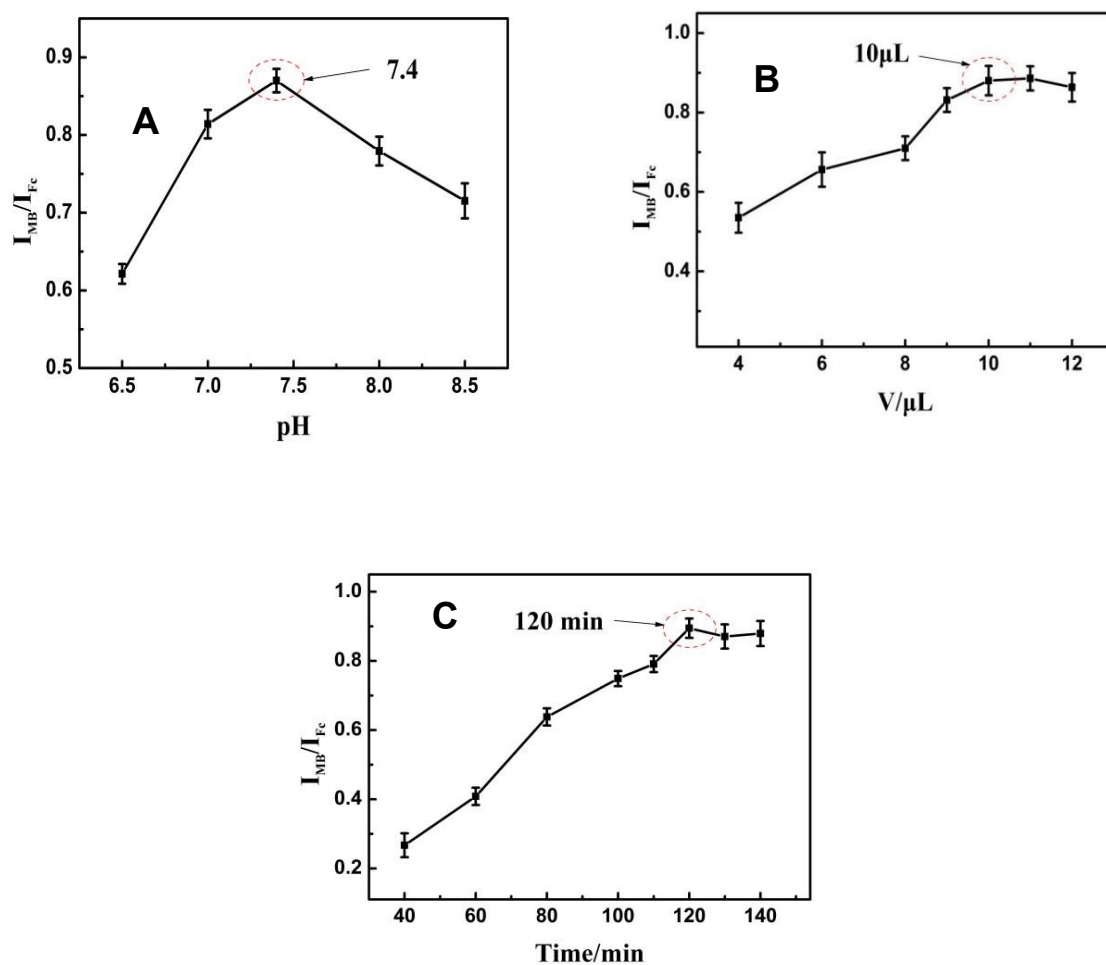

**Fig. S1.** Optimization of experimental conditions (A) pH; (B) Amount of CP; (C) Incubation time  
The concentration of miRNA-155 is 1 nM.

Table S1 Comparison of different electrochemical methods for miRNA detection

| Measure technology | signal | Used material            | Signal Amplification | Target miRNA | Linear range              | Detection limit | Ref.      |
|--------------------|--------|--------------------------|----------------------|--------------|---------------------------|-----------------|-----------|
| DPV                | ratio  | Au NPS                   | HCR +DSM             | miRNA-141    | 0.1fM-100pM               | 11aM            | [18]      |
| DPV                | single | MnO <sub>2</sub> -Au NPs | HCR+HCR              | miRNA-21     | 0.10fM-100nM              | 0.063 fM        | [20]      |
| DPV                | single | CdTe QDs                 | HCR                  | miRNA-21     | 0.1 fM-0.1 nM             | 0.033 fM        | [22]      |
| DPV                | single | Au NPs-GO                | HCR                  | miRNA-155    | 10 fM-1.0 nM              | 3.3 fM          | [23]      |
| SWV                | single | Cu-NMOF@pt NPs/HRP       | Pt NPs/HRP           | miRNA-155    | 0.5-1.0×10 <sup>5</sup> M | 0.13f M         | [24]      |
| SWV                | single | /                        | /                    | miRNA-155    | 10aM-1.0nM                | 5.7aM           | [ 25]     |
| CC                 | single | GO QDs                   | HRP                  | miRNA-155    | 1 fM-100pM                | 0.14fM          | [26]      |
| DPV                | ratio  | Au NPs                   | HCR                  | miRNA-155    | 100fM - 100 nM            | 33fM            | This work |

Notes: NPs: Nanoparticles ; HCR: Hybridization chain reaction ; QD: Quantum dot ; GO : Graphene oxide; MOF : metal organic frame ; HRP::Horseradish peroxidase; DSM:duplex-specific nuclease

DPV: Differential pulse voltammetry; SWV: Square wave voltammetry; CC : Chronocoulometry
